# Supplementary material for: Endogenous and Antipsychotic-Related Risks for Diabetes Mellitus in Young People With Schizophrenia: A Danish Population-Based Cohort Study
Source: Atypon-hosted journal article supplement (doi:10.1176/appi.ajp.2016.16040442), 2017-01-20

## Supplemental data

1. **Appendix S1:** Antipsychotic drugs and their Anatomical Therapeutic Chemical (ATC) classification system codes (pages 2-3).
2. **Appendix S2:** Age-specific incidence rates of type-2 diabetes mellitus in people with and without schizophrenia (page 4).
3. **Appendix S3:** Endogenous risk for type-2 diabetes mellitus in antipsychotic naive people with schizophrenia (page 5-6).
4. **Appendix S4:** Risperidone, Quetiapine, and Ziprasidone related risks for diabetes mellitus in people with schizophrenia (page 7-8).
5. **Appendix S5:** Antipsychotic-related risks for type-2 diabetes mellitus in people with schizophrenia (pages 9-10).
6. **Figure S1:** Flow chart presenting identification of people with diabetes mellitus based on hospital admissions and prescriptions filled for antidiabetic drugs (pages 11-12).
7. **Figure S2:** Age-specific incidence rates of diabetes mellitus in people with and without schizophrenia (page 13).

**Appendix S1:** Antipsychotic drugs and their Anatomical Therapeutic Chemical (ATC) classification system codes

| <b>ATC code</b> | <b>Antipsychotic drug</b> |
|-----------------|---------------------------|
| N05AA01         | Chlorpromazine            |
| N05AA02         | Levomepromazine           |
| N05AA03         | Promazine                 |
| N05AA04         | Acepromazine              |
| N05AB02         | Fluphenazine              |
| N05AB03         | Perphenazine              |
| N05AB04         | Prochlorperazine          |
| N05AC01         | Periciazine               |
| N05AC02         | Thioridazine              |
| N05AD01         | Haloperidol               |
| N05AD05         | Pipamperone               |
| N05AD08         | Droperidol                |
| N05AF01         | Flupentixol               |
| N05AF03         | Chlorprothixene           |
| N05AF04         | Tiotixene                 |
| N05AF05         | Zuclopenthixol            |
| N05AG02         | Pimozide                  |

| <b>ATC code</b> | <b>Antipsychotic drug</b> |
|-----------------|---------------------------|
| N05AG03         | Penfluridol               |
| N05AD03         | Melperone                 |
| N05AE03         | Sertindole                |
| N05AE04         | Ziprasidone               |
| N05AH02         | Clozapine                 |
| N05AH03         | Olanzapine                |
| N05AH04         | Quetiapine                |
| N05AH05         | Asenapine                 |
| N05AL01         | Sulpiride                 |
| N05AL05         | Amisulpride               |
| N05AX08         | Risperidone               |
| N05AX12         | Aripiprazole              |
| N05AX13         | Paliperidone              |

**Appendix U2:** Age-specific incidence rates of type-2 diabetes mellitus in people with and without schizophrenia

| Age group (years) | People without schizophrenia |                       |                              |                  | People with schizophrenia |                       |                              |                  |
|-------------------|------------------------------|-----------------------|------------------------------|------------------|---------------------------|-----------------------|------------------------------|------------------|
|                   | Person-years (millions)      | Incident diabetes (n) | Incidence rates <sup>a</sup> | 95% CI           | Person-years              | Incident diabetes (n) | Incidence rates <sup>a</sup> | 95% CI           |
| 0-9               | 23.67                        | 577                   | 0.02                         | 0.02-0.03        | 29.12                     | 0                     | 0.00                         | -                |
| 10-14             | 9.18                         | 297                   | 0.03                         | 0.03-0.04        | 269.44                    | 0                     | 0.00                         | -                |
| 15-19             | 7.36                         | 1,306                 | 0.18                         | 0.17-0.19        | 4,835.80                  | 14                    | 2.90                         | 1.71-4.89        |
| 20-24             | 5.16                         | 886                   | 0.17                         | 0.16-0.18        | 16,325.62                 | 69                    | 3.00                         | 2.27-3.97        |
| 25-29             | 2.99                         | 1,245                 | 0.42                         | 0.39-0.44        | 17,022.70                 | 68                    | 3.99                         | 3.15-5.07        |
| 30-36             | 1.25                         | 991                   | 0.79                         | 0.74-0.84        | 9,036.40                  | 55                    | 6.09                         | 4.67-7.93        |
| <b>0-36</b>       | <b>49.61</b>                 | <b>5,302</b>          | <b>0.11</b>                  | <b>0.10-0.11</b> | <b>47,519.08</b>          | <b>186</b>            | <b>3.91</b>                  | <b>3.39-4.52</b> |

<sup>a</sup> Incidence rates of type-2 diabetes mellitus per 1000 person-years

**Appendix UB:** Endogenous risk for type-2 diabetes mellitus in antipsychotic naive people with schizophrenia

|                                                                           | <b>Incidence rates<sup>a</sup></b> | <b>95% CI<sup>a</sup></b> | <b>Adjusted hazard-ratio</b> | <b>95% CI</b>          | <b>p-value</b> |
|---------------------------------------------------------------------------|------------------------------------|---------------------------|------------------------------|------------------------|----------------|
| <b>Follow-up censored at first antipsychotic prescription<sup>b</sup></b> |                                    |                           |                              |                        |                |
| People without schizophrenia (N=2,736,510) <sup>c</sup>                   | 0.10                               | 0.10-0.10                 | 1.00                         | Reference              | -              |
| People with schizophrenia (n=4,322)                                       | 1.68                               | 0.93-3.03                 | 4.58 <sup>d</sup>            | 2.53-8.28 <sup>d</sup> | <0.001         |
| People with schizophrenia (n=4,322)                                       | 1.68                               | 0.93-3.03                 | 4.71 <sup>e</sup>            | 2.60-8.51 <sup>e</sup> | <0.001         |
| <b>No use of antipsychotics during the entire follow-up<sup>f</sup></b>   |                                    |                           |                              |                        |                |
| People without schizophrenia (n=2,673,114)                                | 0.10                               | 0.10-0.10                 | 1.00                         | Reference              | -              |
| People with schizophrenia (n=1,154)                                       | 1.63                               | 0.73-3.62                 | 3.91 <sup>d</sup>            | 1.75-8.71 <sup>d</sup> | 0.001          |
| People with schizophrenia (n=1,154)                                       | 1.63                               | 0.73-3.62                 | 3.64 <sup>e</sup>            | 1.63-8.12 <sup>e</sup> | 0.002          |

<sup>a</sup> Incidence rates of type-2 diabetes mellitus per 1000 person-years; <sup>b</sup> Data were censored at the earliest date among the following, date of diagnosis of potential type-2 diabetes diagnoses, date of starting any antipsychotic medication, date of death, date of emigration from Denmark,

and the end of follow-up on 01/01/2013; <sup>c</sup> Assuming that the people with schizophrenia were at risk for DM after the diagnosis of schizophrenia, analyses were carried out with reference groups including data of people without schizophrenia, and of antipsychotic naive people with schizophrenia before the diagnosis of schizophrenia; <sup>d</sup> adjusted for the effects of gender, family history of diabetes, and urbanicity; <sup>e</sup> Adjusted for the effects of gender, family history of diabetes, urbanicity, exposure to valproate, and exposure to tricyclic or tetracyclic antidepressants; <sup>f</sup> Endogenous risk for diabetes in people with schizophrenia, who remained antipsychotic naive until the end of follow-up, was evaluated with reference to people without schizophrenia, who have not been exposed to any antipsychotic medications.

**Appendix U4:** Risperidone, Quetiapine, and Ziprasidone related risks for diabetes mellitus in people with schizophrenia

|                                                    | <b>Incidence rates<sup>a</sup></b> | <b>95% CI<sup>a</sup></b> | <b>Adjusted hazard-ratio<sup>b</sup></b> | <b>95% CI<sup>b</sup></b> | <b>p-value</b> |
|----------------------------------------------------|------------------------------------|---------------------------|------------------------------------------|---------------------------|----------------|
| <b>Risks with starting risperidone</b>             |                                    |                           |                                          |                           |                |
| Before starting risperidone (n=7,600) <sup>c</sup> | 3.45                               | 2.82-4.22                 | 1.00                                     | Reference                 | -              |
| After starting risperidone (n=2,158)               | 5.29                               | 4.14-6.76                 | 1.88                                     | 1.36-2.60                 | <0.001         |
| <b>Risks with starting quetiapine</b>              |                                    |                           |                                          |                           |                |
| Before starting quetiapine (n=7,745) <sup>d</sup>  | 3.43                               | 2.83-4.14                 | 1.00                                     | Reference                 | -              |
| After starting quetiapine (n=2,770)                | 6.10                               | 4.85-7.67                 | 2.72                                     | 2.00-3.71                 | <0.001         |
| <b>Risks with starting ziprasidone</b>             |                                    |                           |                                          |                           |                |
| Before starting ziprasidone (n=8,817) <sup>e</sup> | 3.67                               | 3.12-4.32                 | 1.00                                     | Reference                 | -              |
| After starting ziprasidone (n=916)                 | 6.54                               | 4.74-9.02                 | 2.45                                     | 1.68-3.57                 | <0.001         |

<sup>a</sup> Incidence rates of diabetes mellitus per 1000 person-years; <sup>b</sup> Adjusted hazard-ratios that were estimated by cox proportional hazard regression models. These models included gender, family history of diabetes, and urbanicity as time-independent covariates, and calendar period, Defined Daily Doses (DDD) of antipsychotics, DDD of valproate, and DDD of tricyclic or tetracyclic antidepressants as time-dependent covariates; <sup>c</sup> People with schizophrenia, who had received risperidone before their diagnosis of schizophrenia, were excluded from this analysis; <sup>d</sup> People

with schizophrenia, who had received quetiapine before their diagnosis of schizophrenia, were excluded from this analysis; <sup>e</sup> People with schizophrenia, who had received ziprasidone before their diagnosis of schizophrenia, were excluded from this analysis.



**Appendix S5:** Antipsychotic-related risks for Type-2 Diabetes Mellitus in people with schizophrenia

|                                                                                                     | <b>Incidence rates<sup>a</sup></b> | <b>95% CI<sup>a</sup></b> | <b>Adjusted hazard-ratio<sup>b</sup></b> | <b>95% CI<sup>b</sup></b> | <b>p-value</b> |
|-----------------------------------------------------------------------------------------------------|------------------------------------|---------------------------|------------------------------------------|---------------------------|----------------|
| <b>Risks with starting antipsychotics</b>                                                           |                                    |                           |                                          |                           |                |
| Before starting any antipsychotic medication<br>(n=4,322) <sup>c</sup>                              | 1.68                               | 0.93-3.03                 | 1.00                                     | Reference                 | -              |
| After starting any antipsychotic medication<br>(n=3,168)                                            | 3.70                               | 2.91-4.69                 | 3.79                                     | 1.97-7.26                 | <0.001         |
| After first-line treatment with a first-generation antipsychotic medication (n=450)                 | 3.92                               | 2.23-6.90                 | 3.62                                     | 1.49-8.83                 | 0.005          |
| After first-line treatment with a second-generation antipsychotic medication (n=1,708) <sup>d</sup> | 3.36                               | 2.30-4.90                 | 4.08                                     | 1.87-8.91                 | <0.001         |
| After first-line treatment with a second-generation antipsychotic medication (n=2,311) <sup>e</sup> | 3.27                               | 2.40-4.45                 | 3.67                                     | 1.80-7.49                 | <0.001         |
| <b>Risks with starting olanzapine</b>                                                               |                                    |                           |                                          |                           |                |
| Before starting olanzapine (n=7,652) <sup>f</sup>                                                   | 3.41                               | 2.78-4.17                 | 1.00                                     | Reference                 | -              |

|                                                     |      |            |      |           |        |
|-----------------------------------------------------|------|------------|------|-----------|--------|
| After starting olanzapine (n=2,115)                 | 4.79 | 3.72-6.17  | 1.94 | 1.39-2.71 | <0.001 |
| <b>Risks with starting aripiprazole</b>             |      |            |      |           |        |
| Before starting aripiprazole (n=8,358) <sup>g</sup> | 3.39 | 2.83-4.07  | 1.00 | Reference | -      |
| After starting aripiprazole (n=2,719)               | 4.93 | 3.79-6.42  | 2.19 | 1.57-3.07 | <0.001 |
| <b>Risks with starting clozapine</b>                |      |            |      |           |        |
| Before starting clozapine (n=8,890) <sup>h</sup>    | 3.58 | 3.05-4.19  | 1.00 | Reference | -      |
| After starting clozapine (n=862)                    | 7.19 | 5.09-10.17 | 3.25 | 2.19-4.82 | <0.001 |

<sup>a</sup> Incidence rates of potential type-2 diabetes mellitus per 1000 person-years; <sup>b</sup> Adjusted hazard-ratios that were estimated by cox proportional hazard regression models. These models included gender, family history of diabetes, and urbanicity as time-independent covariates, and calendar period, Defined Daily Doses (DDD) of antipsychotics, DDD of valproate, and DDD of tricyclic or tetracyclic antidepressants as time-dependent covariates; <sup>c</sup> People with schizophrenia, who were antipsychotic naive at the time of diagnosis of schizophrenia; <sup>d</sup> Starting monotherapy with all second-generation antipsychotics except Olanzapine and Clozapine; <sup>e</sup> Starting monotherapy with all second-generation antipsychotics except Clozapine; <sup>f</sup> People with schizophrenia, who had received olanzapine before their diagnosis of schizophrenia, were excluded from this analysis; <sup>g</sup> People with schizophrenia, who had received aripiprazole before their diagnosis of schizophrenia, were excluded from this analysis; <sup>h</sup> People with schizophrenia, who had received clozapine before their diagnosis of schizophrenia, were excluded from this analysis.

**Figure S1:** Flow chart presenting identification of people with Diabetes Mellitus (DM) on the basis of hospital admissions, prescriptions, and filled for antidiabetic drugs

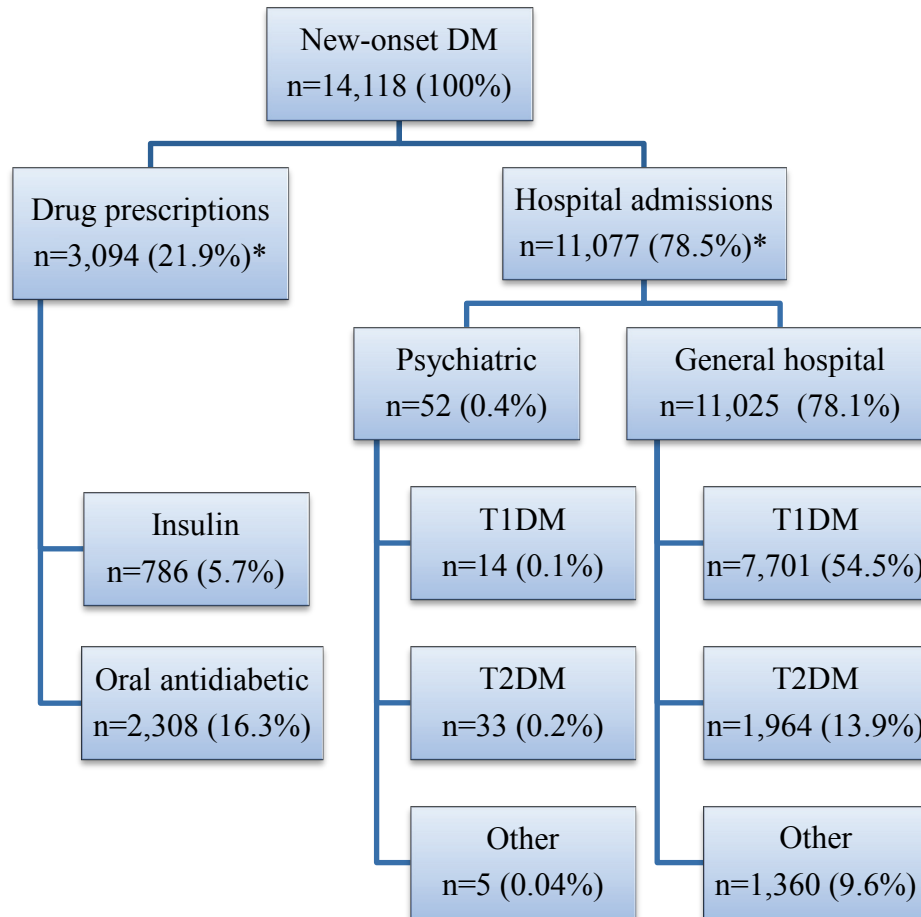

\*Overlap: 53 filled a prescription for an antidiabetic drug on the day of a general hospital admission; T1DM: type-1 Diabetes Mellitus; ICD-10: E10; O24.0; ICD-8: 249; T2DM: type-2 Diabetes Mellitus; ICD-10: E11; O24.1; ICD-8: 250; Other: ICD 8/10: E12-14, H36.0, O24.2, O24.3, O24.5, O24.9; Among the 14,118 new-onset DM, 4,277 could be recognised as T2DM at the time of their first DM diagnoses.

Figure S2: Age-specific incidence rates of diabetes mellitus in people with and without schizophrenia

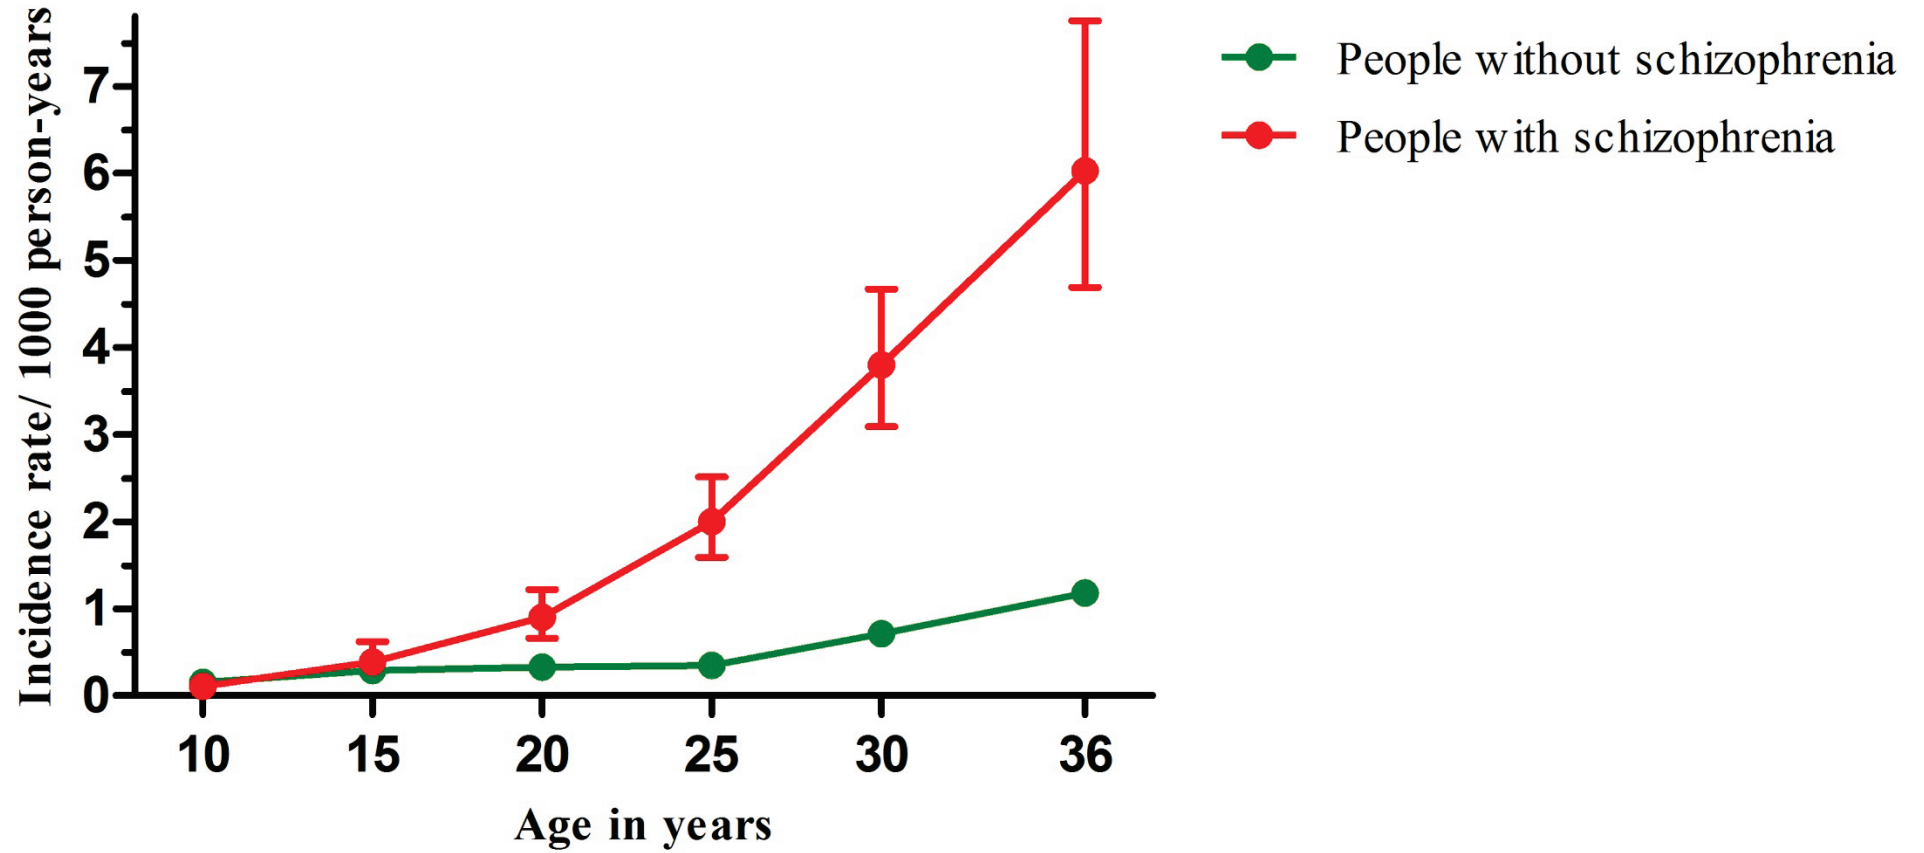

Supplement: appi.ajp.2016.16040442.ds001.pdf [file appi.ajp.2016.16040442.ds001.pdf]
